# Supplementary material for: In vivo assembly enhanced binding effect augments tumor specific ferroptosis therapy
Source: Springer Nature journal article supplement (doi:10.1038/s41467-023-44665-2), 2024-01-11
Supplement: MOESM1 [file 41467_2023_44665_MOESM1_ESM.pdf]

## Supplementary Information

### In Vivo Assembly Enhanced Binding Effect Augments Tumor Specific Ferroptosis Therapy

Da-Yong Hou,<sup>#,a,b,c</sup> Dong-Bing Cheng,<sup>#,d</sup> Ni-Yuan Zhang,<sup>#,a</sup> Zhi-Jia Wang,<sup>a,b,c</sup> Xing-Jie Hu,<sup>a</sup> Xin Li,<sup>d</sup> Mei-Yu Lv,<sup>b</sup> Xiang-Peng Li,<sup>a,b,c</sup> Ling-Rui Jian,<sup>b,c</sup> Jin-Peng Ma,<sup>b,c</sup> Taolei Sun,<sup>d\*</sup> Zeng-Ying Qiao,<sup>a\*</sup> Wanhai Xu<sup>b,c\*</sup> and Hao Wang<sup>a\*</sup>

<sup>a</sup>CAS Key Laboratory for Biomedical Effects of Nanomaterials and Nanosafety, CAS Center for Excellence in Nanoscience, National Center for Nanoscience and Technology (NCNST), Beijing, 100190, China.

<sup>b</sup>NHC and CAMS Key Laboratory of Molecular Probe and Targeted Theranostics, Harbin Medical University, Harbin, 150001, China.

<sup>c</sup>Department of Urology, Harbin Medical University Cancer Hospital, Heilongjiang Key Laboratory of Scientific Research in Urology, Harbin, 150001, China.

<sup>d</sup>School of Chemistry, Chemical Engineering & Life Science, Hubei Key Laboratory of Nanomedicine for Neurodegenerative Diseases, Wuhan University of Technology, No. 122 Luoshi Road, Wuhan, 430070, PR China.

<sup>#</sup>These authors contributed equally: Da-Yong Hou, Dong-Bing Cheng and Ni-Yuan Zhang.

**\*Corresponding e-mail address:** suntl@whut.edu.cn, qiaozy@nanoctr.cn, xuwanhai@hrbmu.edu.cn and wanghao@nanoctr.cn

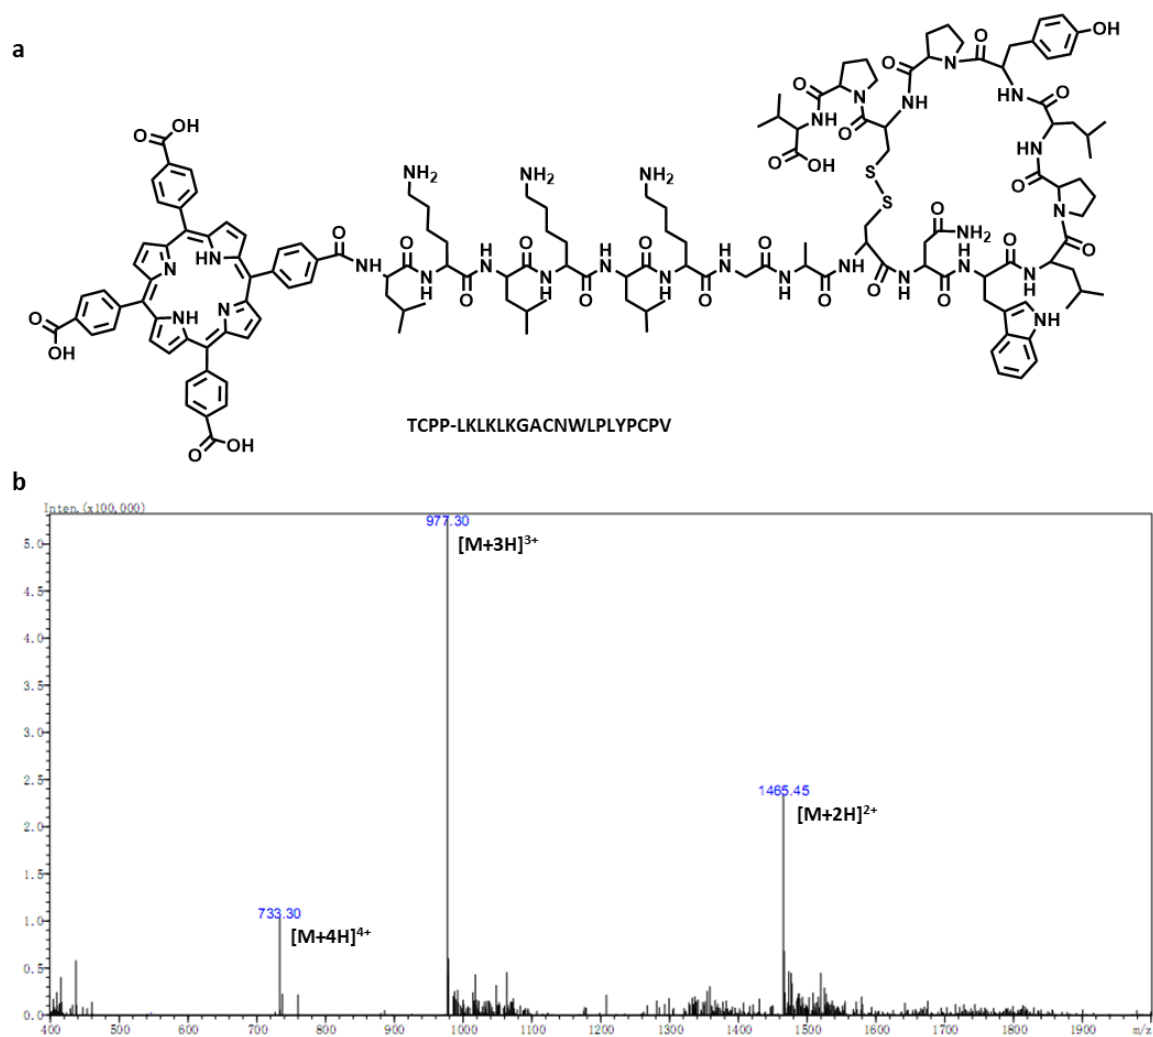

**Supplementary Fig. 1.** Molecular structure (**a**) and corresponding MALDI-TOF-MS spectrum (**b**) of TCPP-LKLKLGACNWLPLYPCPV. Calculated molecular weight of TCPP-LKLKLGACNWLPLYPCPV is 2927.

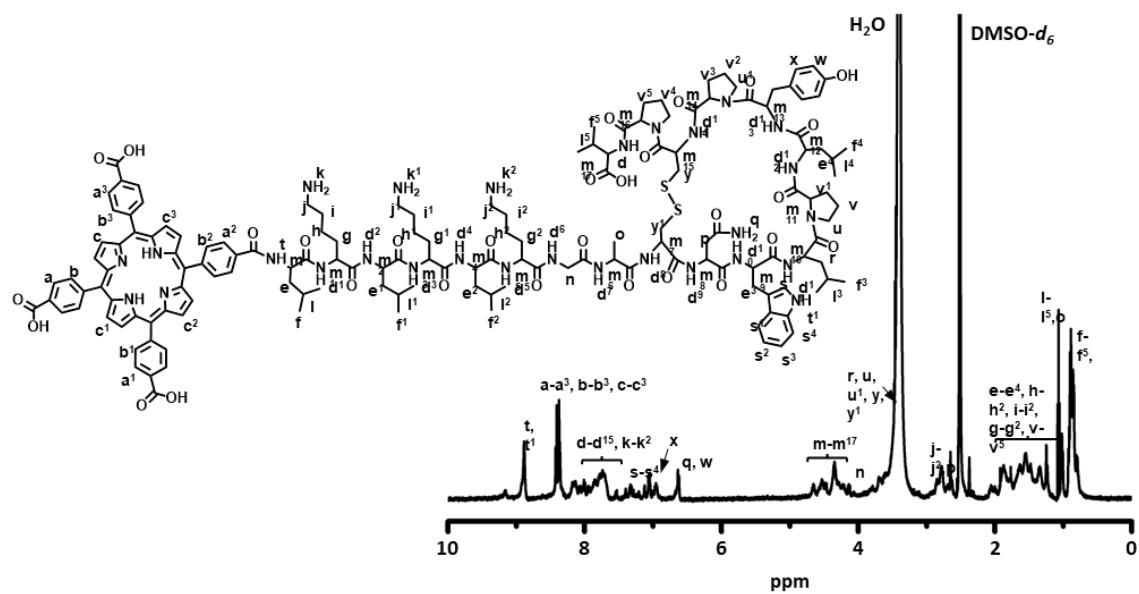

**Supplementary Fig. 2.**  $^1\text{H}$  NMR (400 MHz,  $\text{DMSO}-d_6$ ) spectrum of TCPP-LKLKLGACNWLPLYPCPV.

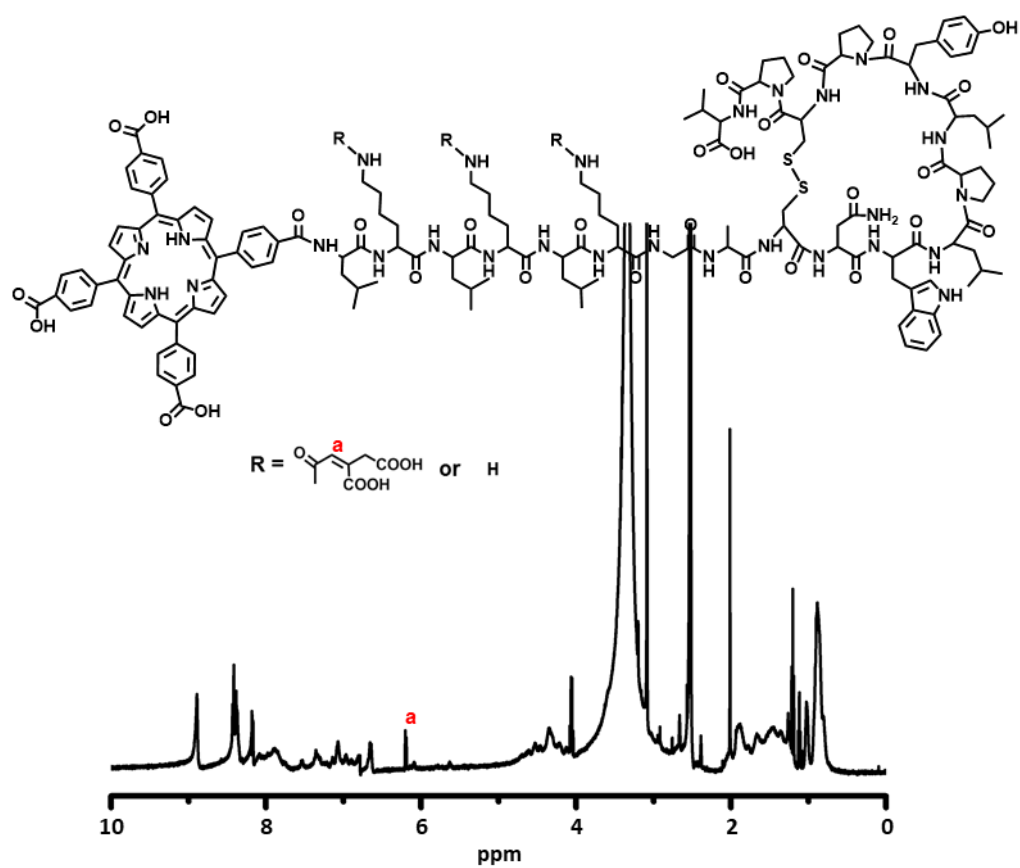

**Supplementary Fig. 3.**  $^1\text{H}$  NMR (400 MHz,  $\text{DMSO}-d_6$ ) spectrum of TCPP-LKLKLK(CAA)GACNWLPLYPCPV.

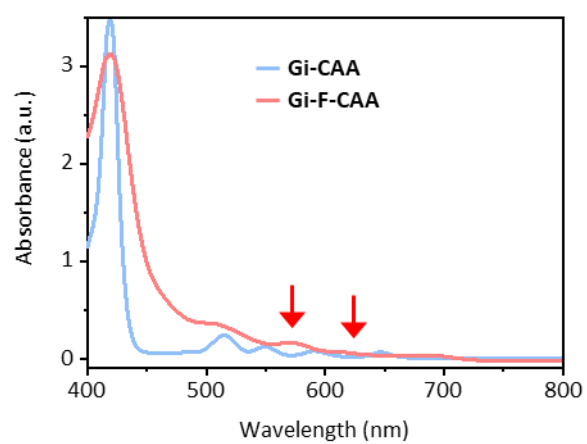

**Supplementary Fig. 4.** UV-visible absorption of Gi-CAA and **Gi-F-CAA**. The two characteristic Q-band peaks (red arrows) demonstrated the iron chelate.

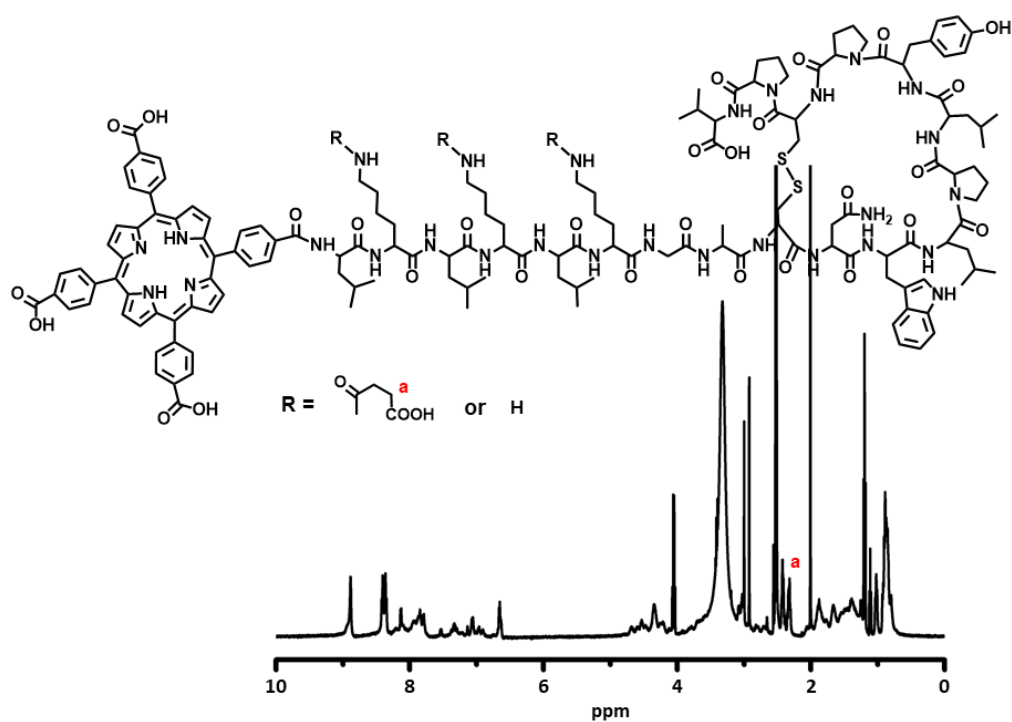

**Supplementary Fig. 5.**  $^1\text{H}$  NMR (400 MHz, DMSO- $d_6$ ) spectrum of TCPP-LKLK(LK)(SA)GACNWLPLYPCPV.

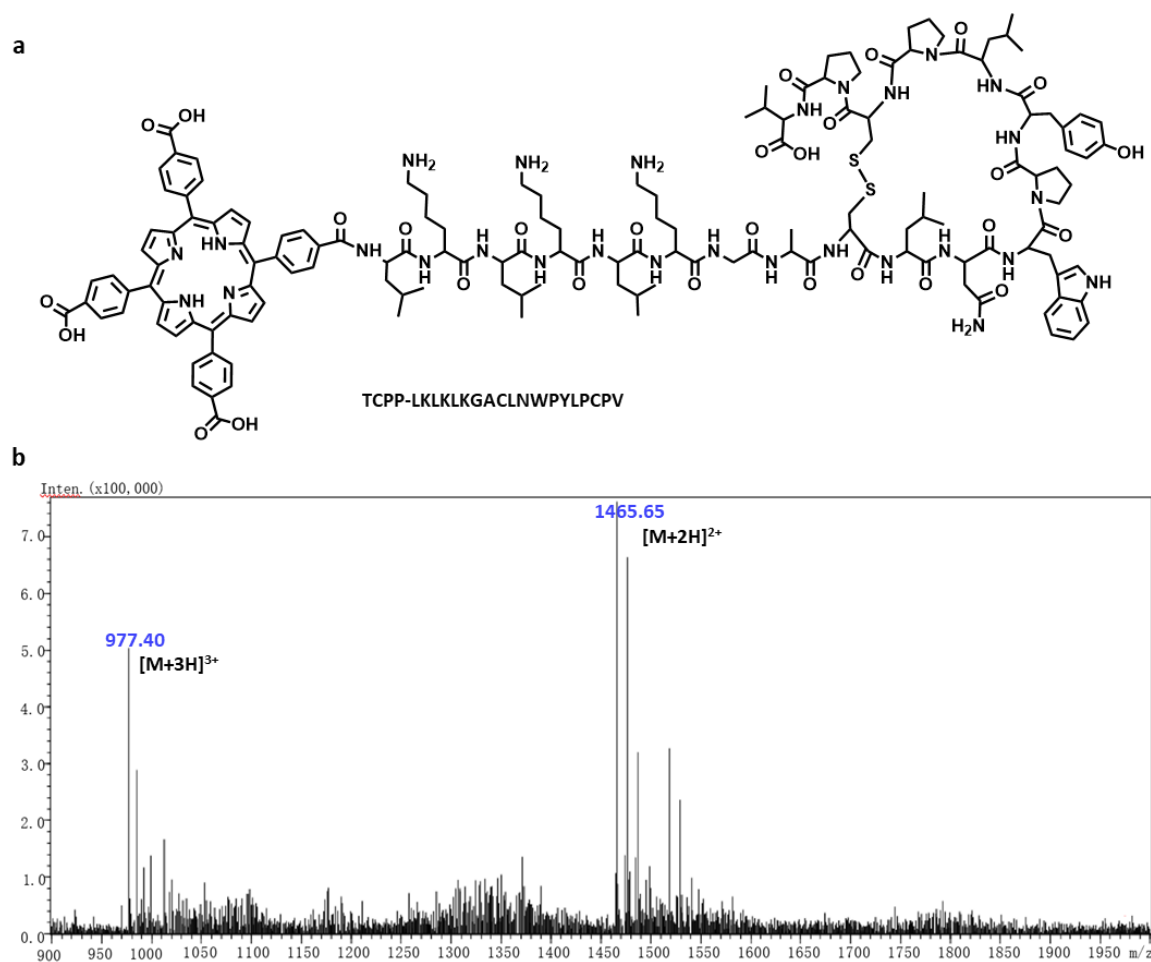

**Supplementary Fig. 6.** Molecular structure (**a**) and corresponding MALDI-TOF-MS spectrum (**b**) of TCPP-LKLKLGACLNWPYLPCPV. Calculated molecular weight of TCPP-LKLKLGACLNWPYLPCPV is 2927.

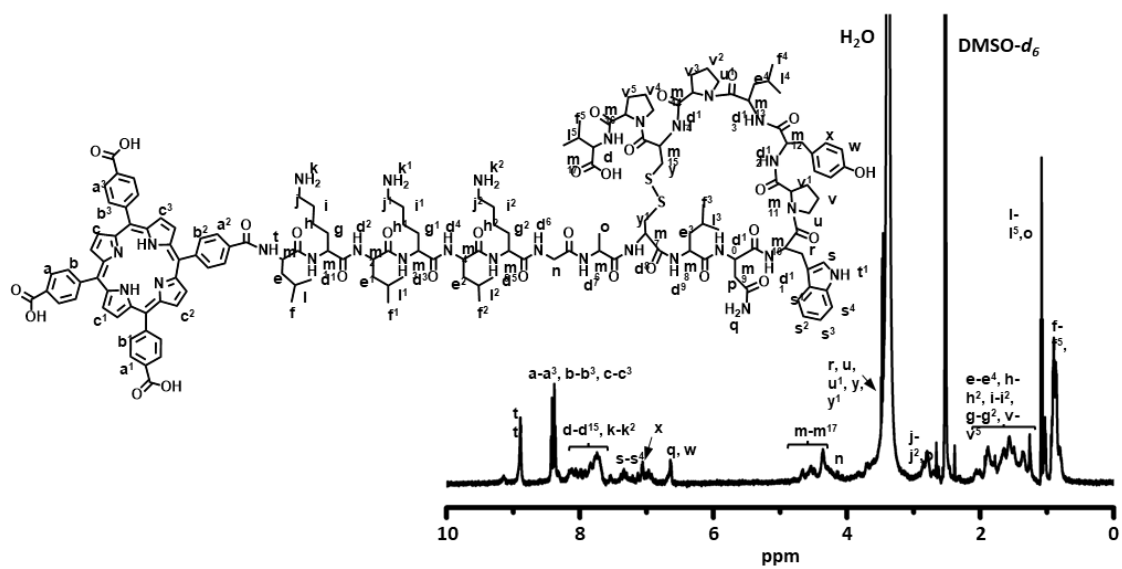

**Supplementary Fig. 7.**  $^1\text{H}$  NMR (400 MHz,  $\text{DMSO}-d_6$ ) spectrum of TCPP-LKLKLGACLNWPYLPCPV.



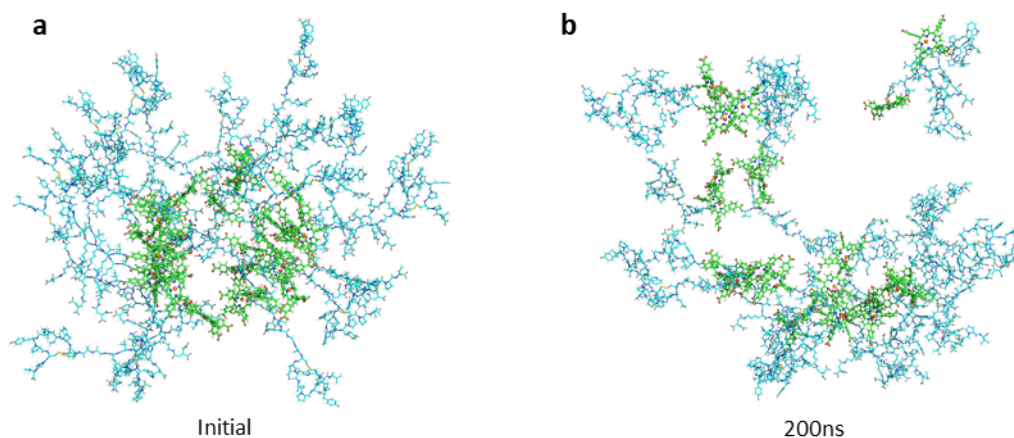

**Supplementary Fig. 8.** (a) The MD simulations of **Gi-F-CAA** begun from a beforehand nanosphere system. (b) The aggregations of **Gi-F-CAA**. The porphyrin parts were shown in sphere-stick mode with the carbon atoms colored in green and the other parts were shown in stick mode with the carbon atoms colored in cyan.

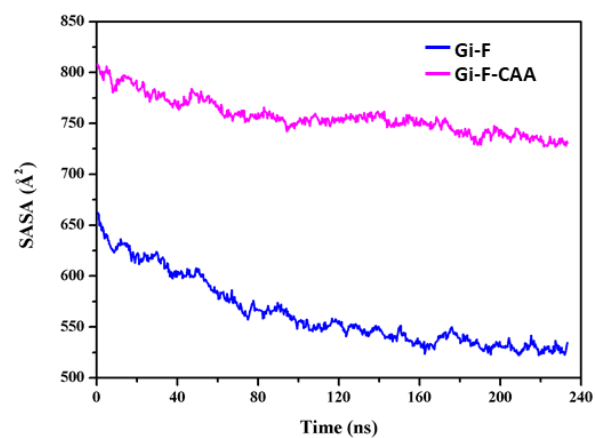

**Supplementary Fig. 9.** SASA values of Gi-F system and **Gi-F-CAA** system during MD simulations.

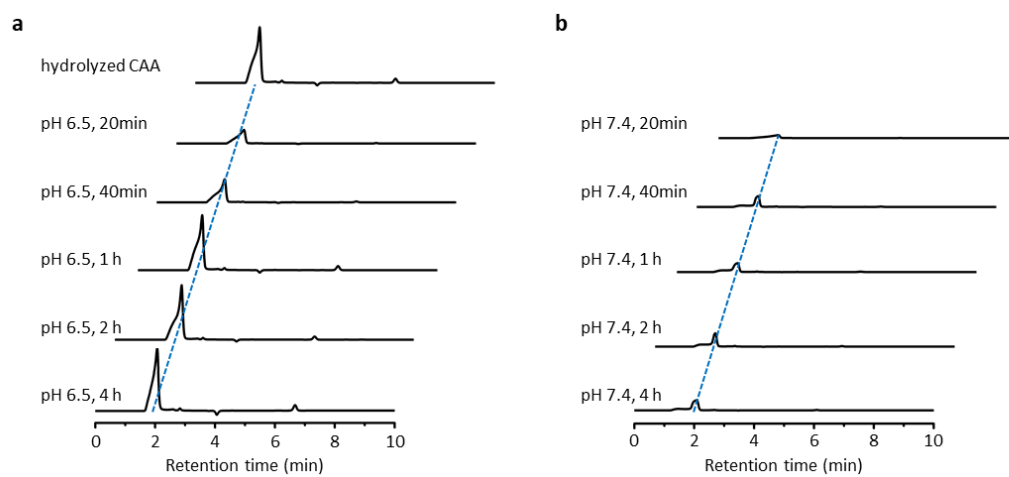

**Supplementary Fig. 10.** The HPLC chromatogram of the **Gi-F-CAA** (40  $\mu$ M) dialyzed (MWCO: 1000) against (a) pH 6.5, (b) pH 7.4 buffer solutions at fixed time intervals.

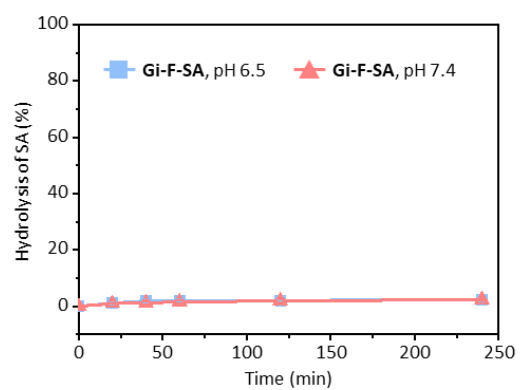

**Supplementary Fig. 11.** The hydrolysis profiles of Gi-F-SA (40  $\mu$ M) at pH 7.4 and 6.5 (PBS, 0.01 M) measured by HPLC (n=3 experimental repeats). Experiment was independently repeated three times with similar results.

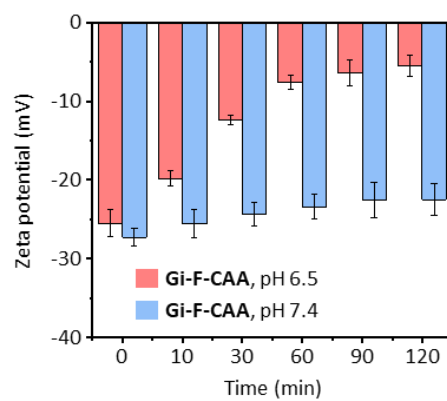

**Supplementary Fig. 12.**  $\zeta$ -potential change of **Gi-F-CAA** (40  $\mu$ M) in PBS (0.01 M, pH 7.4 or 6.5) (n=3 experimental repeats). Experiment was independently repeated three times with similar results. Values are expressed as means  $\pm$  SD.

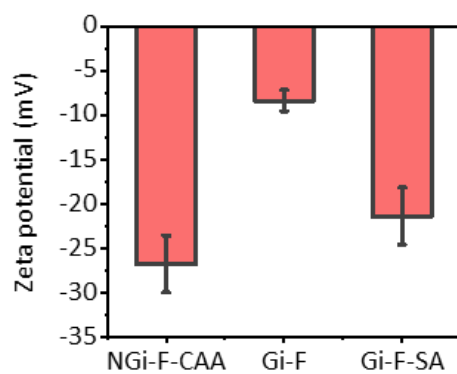

**Supplementary Fig. 13.**  $\zeta$ -potential of NGi-F-CAA, Gi-F and Gi-F-SA (pH 7.4) (40  $\mu$ M) in PBS (n=3 experimental repeats). Experiment was independently repeated three times with similar results. Values are expressed as means  $\pm$  SD.

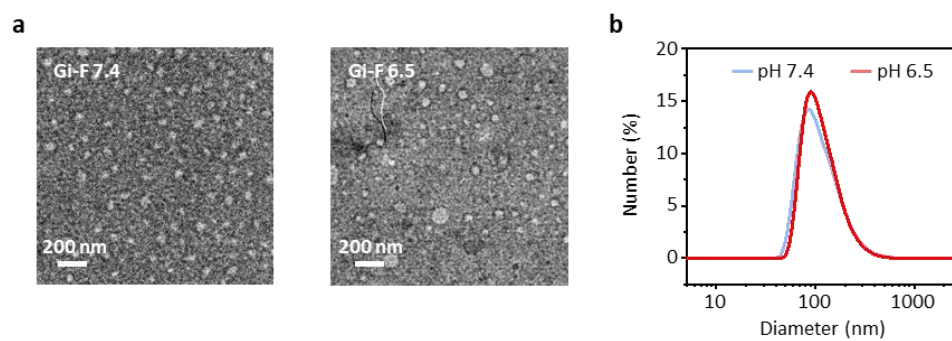

**Supplementary Fig. 14.** (a) Representative TEM images of Gi-F at pH 7.4 and 6.5 (40  $\mu$ M). Scale bars: 200 nm. (b) Particle size of Gi-F at pH 7.4 and 6.5 (40  $\mu$ M) measured by DLS.

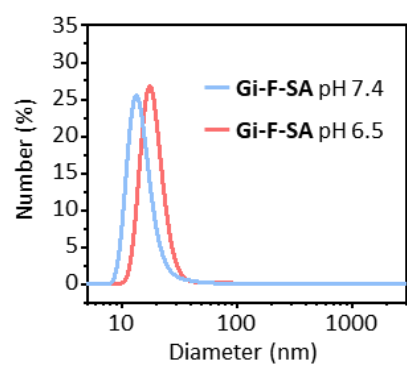

**Supplementary Fig. 15.** Particle size of Gi-F-SA at pH 7.4 and 6.5 (40  $\mu$ M) measured by DLS.



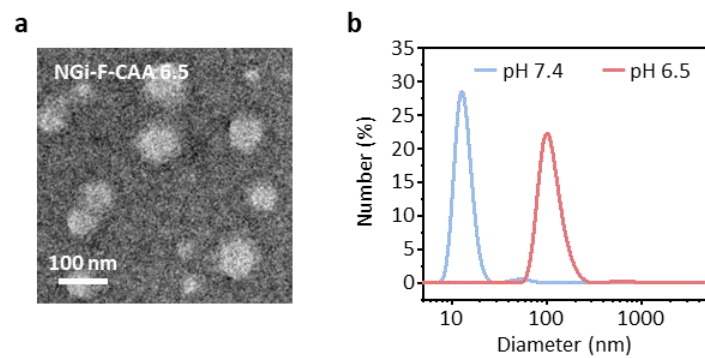

**Supplementary Fig. 16.** (a) Representative TEM images of NGi-F-CAA (pH 6.5) (40  $\mu$ M). Scale bars: 100 nm. (b) Particle size of NGi-F-CAA at pH 7.4 and 6.5 (40  $\mu$ M) measured by DLS.

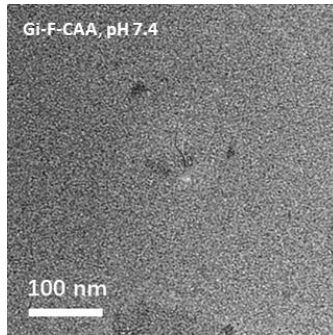

**Supplementary Fig. 17.** Representative TEM image of **Gi-F-CAA** (40  $\mu$ M) in PBS at pH 7.4 for 1 h.

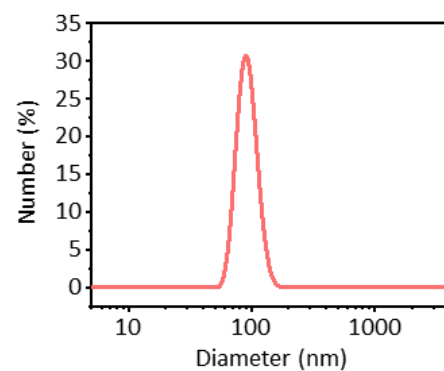

**Supplementary Fig. 18.** Particle size of Gi-F-CAA (40  $\mu$ M) binding to GPX4 in PBS (0.01 M, pH 6.5) measured by DLS.

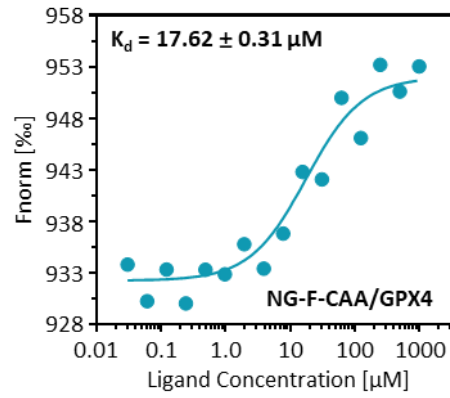

**Supplementary Fig. 19.** The binding affinity of **Gi-F-CAA** to GPX4 by Microscale Thermophoresis (MST) ligand binding measurements.  $K_d$ : the dissociation constant.

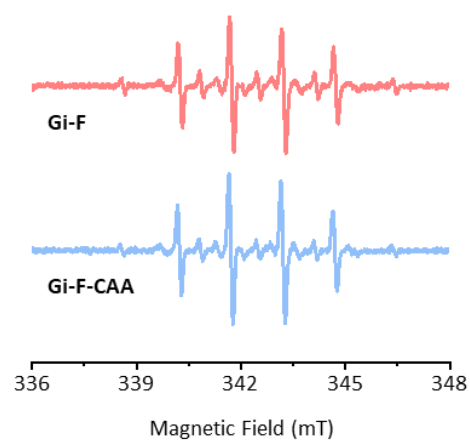

**Supplementary Fig. 20.** EPR spectra of DMPO/ $\cdot$ OH adducts with **Gi-F-CAA** and Gi-F (40  $\mu$ M) after treated with  $\text{H}_2\text{O}_2$  (200  $\mu$ M).

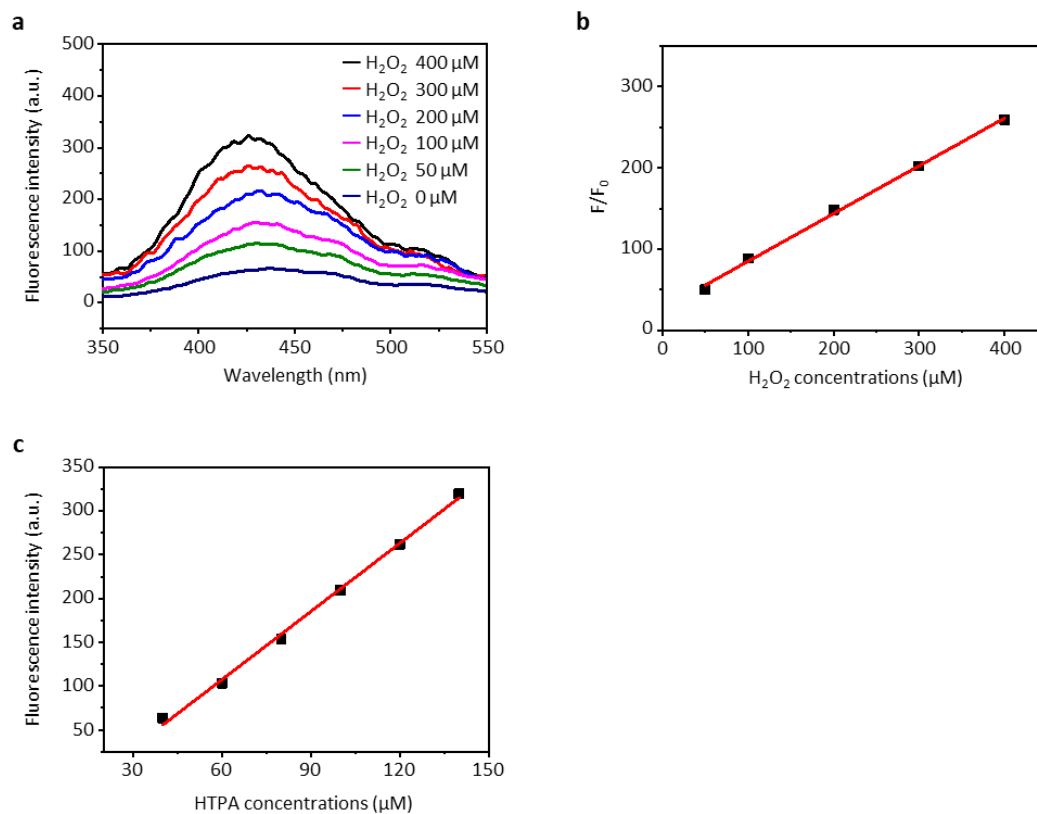

**Supplementary Fig. 21.** Terephthalic acid (TPA) reacts with hydroxyl radical in solution to produce stable and strong fluorescent substances (Ortho-hydroxyterephthalic acid, HTPA). The reaction is used to quantitatively analyze  $\bullet\text{OH}$  produced by Gi-F under the  $\text{H}_2\text{O}_2$  treatment (**a**). Plot showing the linear relationship of relative fluorescence intensity with  $\text{H}_2\text{O}_2$  concentration (**b**). The fluorescence of different concentration of HTPA at 425 nm ( $\lambda_{\text{ex}} = 310$  nm) (**c**).

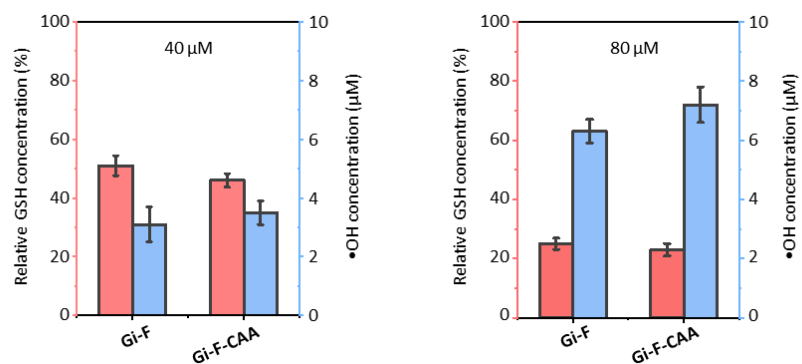

**Supplementary Fig. 22.** Relative GSH concentration depletion and •OH generation of Gi-F-CAA and Gi-F (40 μM or 80 μM) after incubation with H<sub>2</sub>O<sub>2</sub> (200 μM) (n=3 experimental repeats). Experiment was independently repeated three times with similar results.

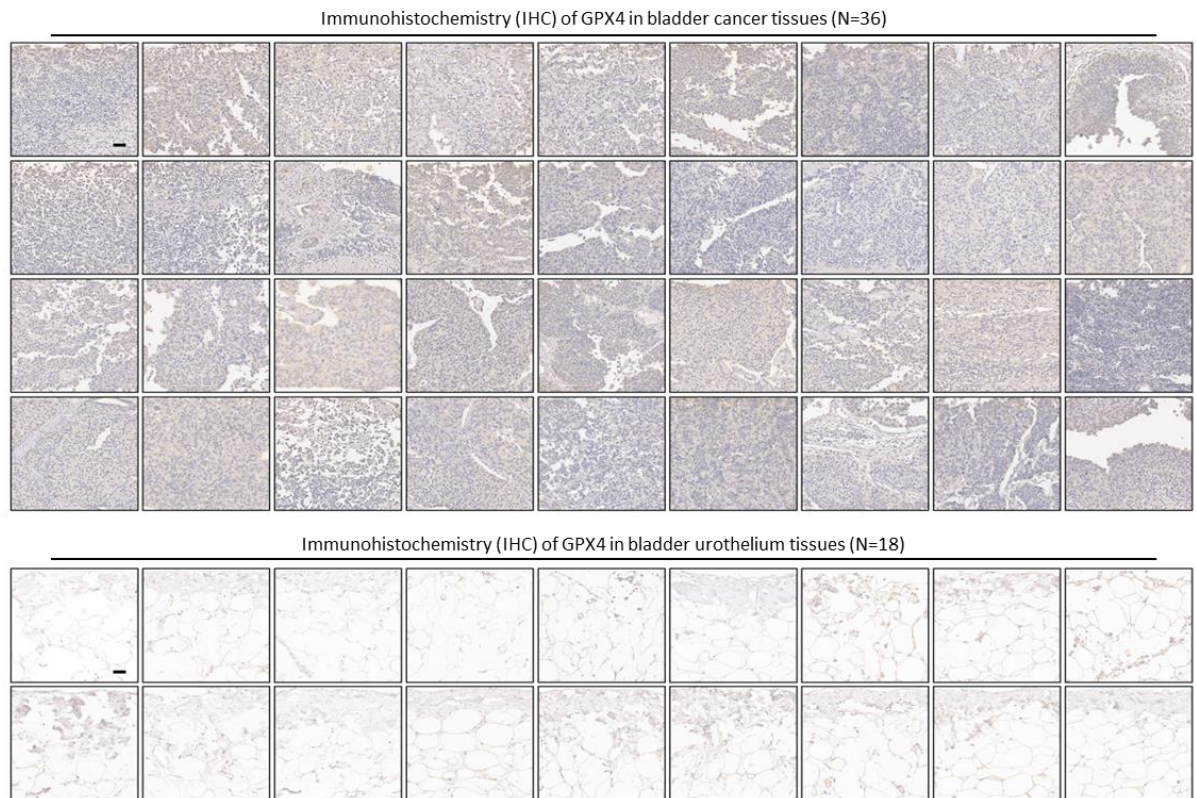

**Supplementary Fig. 23.** GPX4 immunohistochemical staining of bladder tumor tissues and normal bladder tissues. Scale bars: 50  $\mu$ m.



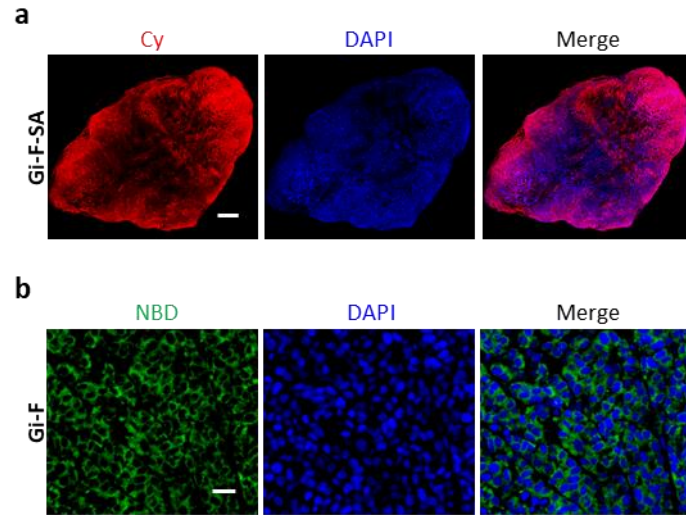

**Supplementary Fig. 24.** (a) Fluorescence of images of the whole tumor tissues after treated with Cy labeled Gi-F-SA (8 mg/kg in 100  $\mu$ L PBS). Scale bars: 1 mm. (b) Fluorescence images of tumor tissues after treated with NBD labeled Gi-F (8 mg/kg in 100  $\mu$ L PBS). Scale bars: 20  $\mu$ m.

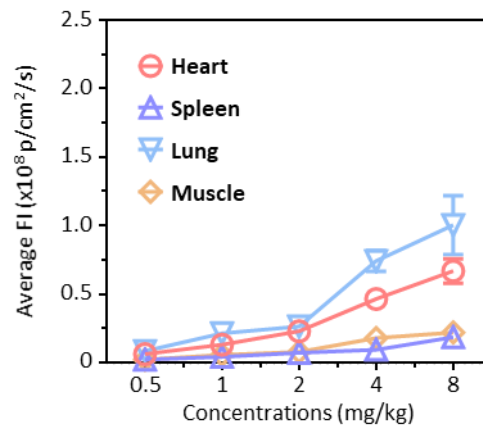

**Supplementary Fig. 25.** Quantitative statistical analysis for the biodistribution of **Gi-F-CAA** in heart, spleen, lung and muscle (n = 3 mice).

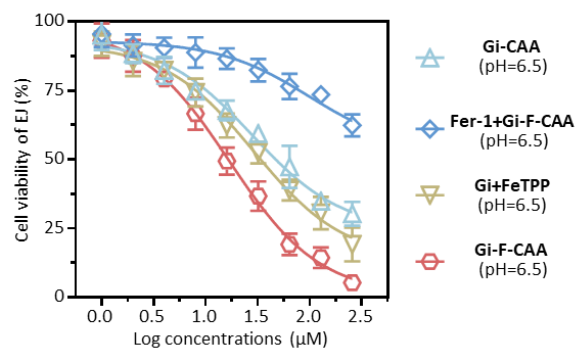

**Supplementary Fig. 26.** The viability of EJ cells after treated with Gi-CAA (pH=6.5), Fer-1+**Gi-F-CAA** (pH=6.5) and **Gi-F-CAA** (pH=6.5) at different concentrations for 48 h (n=3 experimental repeats). Experiment was independently repeated three times with similar results.

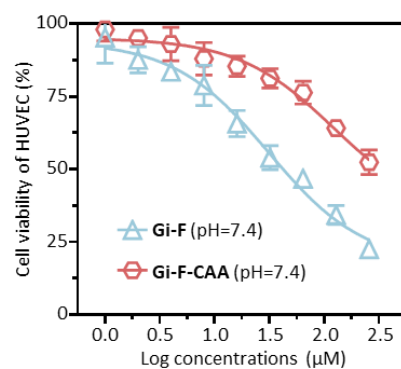

**Supplementary Fig. 27.** Viability of HUVEC cells after treated with Gi-F (pH=7.4) and **Gi-F-CAA** (pH=7.4) at different concentrations for 48 h (n=3 experimental repeats). Experiment was independently repeated three times with similar results.

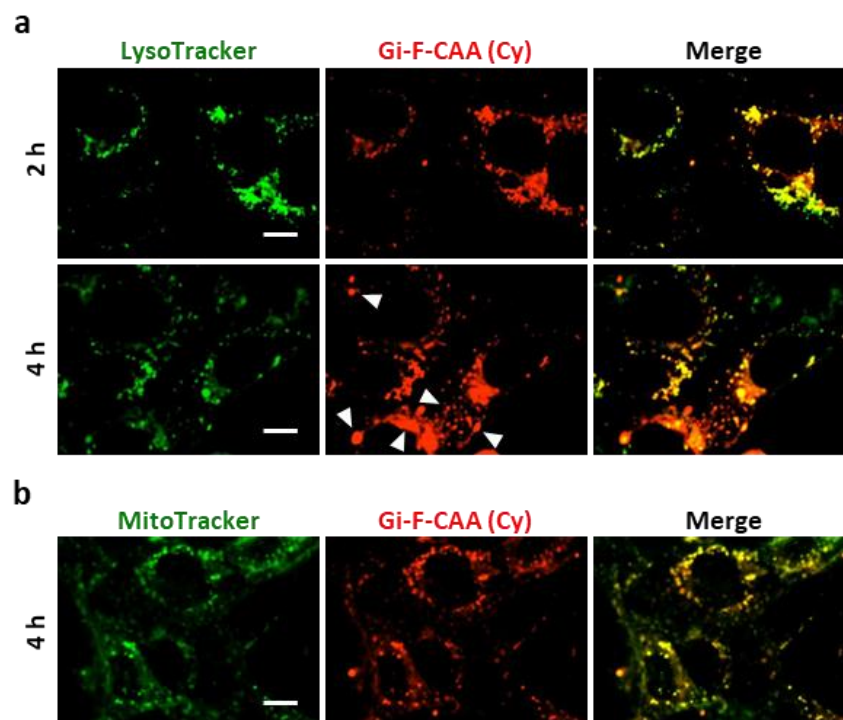

**Supplementary Fig. 28.** (a) Representative fluorescence images of EJ cells after incubation with Cy labeled **Gi-F-CAA** (pH 6.5, 40  $\mu$ M) for 2 and 4 h. Lysosomes were labeled with LysoTracker Green. Scale bar: 10  $\mu$ m. (b) Representative fluorescence images of EJ cells after incubation with Cy labeled **Gi-F-CAA** (pH 6.5, 40  $\mu$ M) for 4 h. Mitochondria were labeled with MitoTracker Green. Scale bar: 10  $\mu$ m.

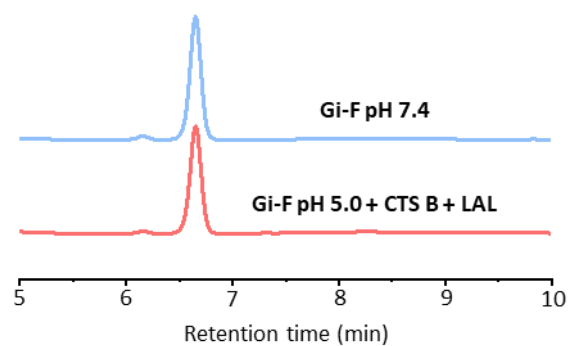

**Supplementary Fig. 29.** HPLC spectra of Gi-F (pH 7.4, 40  $\mu$ M) and Gi-F + CTS + LAL (pH 5.0, 40  $\mu$ M). CTS: Cathepsin. LAL: lysosomalacidllpase.

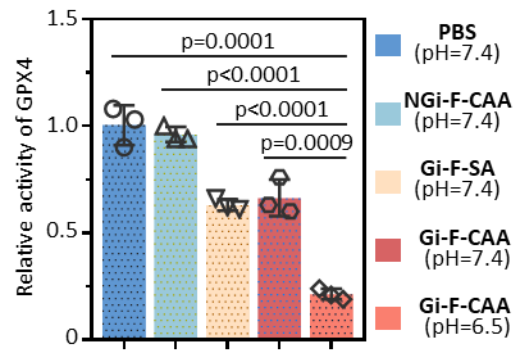

**Supplementary Fig. 30.** Glutathione peroxidase 4 (GPX4) activities after treated with PBS (pH=7.4), NGi-F-CAA (pH=7.4), Gi-F-SA (pH=7.4), **Gi-F-CAA** (pH=7.4) and **Gi-F-CAA** (pH=6.5, 40  $\mu$ M) (n=3 experimental repeats). Experiment was independently repeated three times with similar results. The GPX4 activities of PBS group was normalized as 1. p value was performed with one-way ANOVA followed by post hoc Tukey's test. Data were presented as mean  $\pm$  SD.

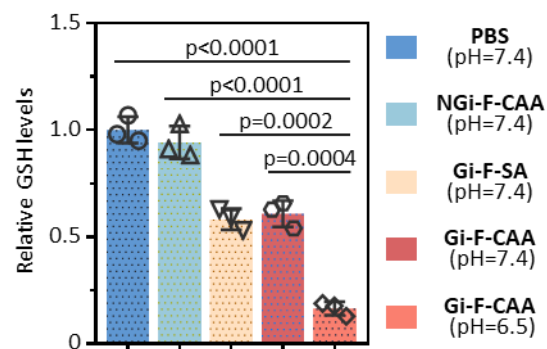

**Supplementary Fig. 31.** Intracellular GSH levels of EJ cells after treated with PBS (pH=7.4), NGi-F-CAA (pH=7.4), Gi-F-SA (pH=7.4), **Gi-F-CAA** (pH=7.4) and **Gi-F-CAA** (pH=6.5, 40  $\mu$ M) (n=3 experimental repeats). Experiment was independently repeated three times with similar results. The GSH levels of PBS group was normalized as 1. p value was performed with one-way ANOVA followed by post hoc Tukey's test. Data were presented as mean  $\pm$  SD.



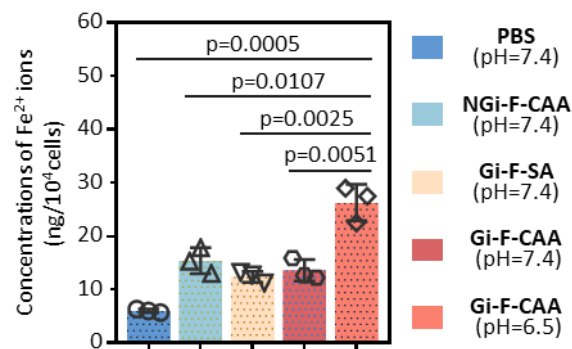

**Supplementary Fig. 32.** Intracellular  $\text{Fe}^{2+}$  ions activities of EJ cells after treated with PBS (pH=7.4), NGi-F-CAA (pH=7.4), Gi-F-SA (pH=7.4), **Gi-F-CAA** (pH=7.4) and **Gi-F-CAA** (pH=6.5, 40  $\mu\text{M}$ ) (n=3 experimental repeats). Experiment was independently repeated three times with similar results. p value was performed with one-way ANOVA followed by post hoc Tukey's test. Data were presented as mean  $\pm$  SD.

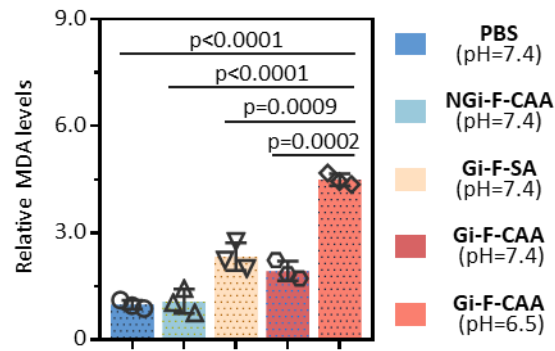

**Supplementary Fig. 33.** Intracellular malonaldehyde (MDA) levels of EJ cells after treated with PBS (pH=7.4), NGi-F-CAA (pH=7.4), Gi-F-SA (pH=7.4), **Gi-F-CAA** (pH=7.4) and **Gi-F-CAA** (pH=6.5, 40  $\mu$ M) (n=3 experimental repeats). Experiment was independently repeated three times with similar results. The MDA levels of PBS group was normalized as 1. p value was performed with one-way ANOVA followed by post hoc Tukey's test. Data were presented as mean  $\pm$  SD.

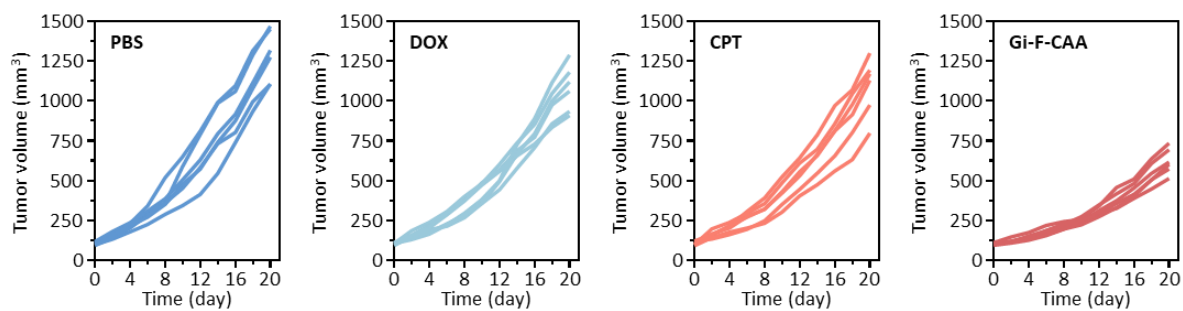

**Supplementary Fig. 34.** The individual tumor growth curves of mice after treated with PBS, DOX (3 mg/kg in 100  $\mu$ L PBS), CPT (3 mg/kg in 100  $\mu$ L PBS) and **Gi-F-CAA** (8 mg/kg in 100  $\mu$ L PBS) over 20 days.

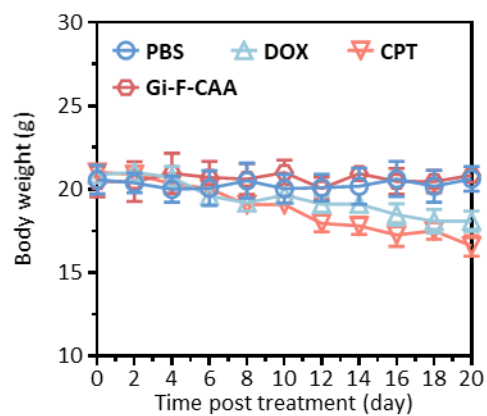

**Supplementary Fig. 35.** Body weight changes of MCF-7/MDR xenografted mice after treated with PBS, DOX (3 mg/kg in 100  $\mu$ L PBS), CPT (3 mg/kg in 100  $\mu$ L PBS) and **Gi-F-CAA** (8 mg/kg in 100  $\mu$ L PBS) over 20 days (n=6 mice). Data were presented as mean  $\pm$  SD.

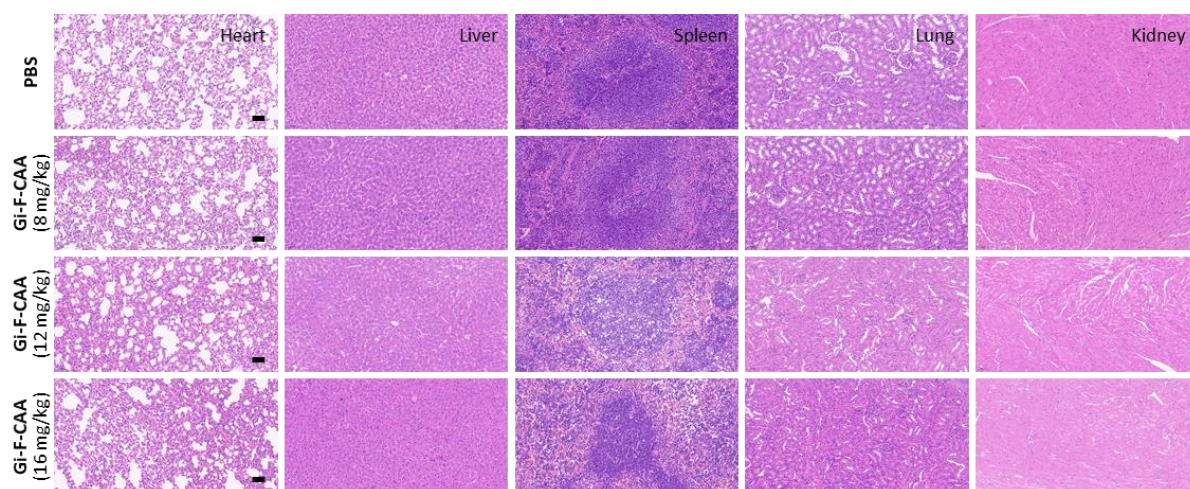

**Supplementary Fig. 36.** Histology evaluation of the major organs by hematoxylin and eosin (H&E) after treatment with PBS and **Gi-F-CAA** (8, 12 and 16 mg/kg in 100 µL PBS) for 1 days (n = 4 mice). Scale bar: 50 µm.

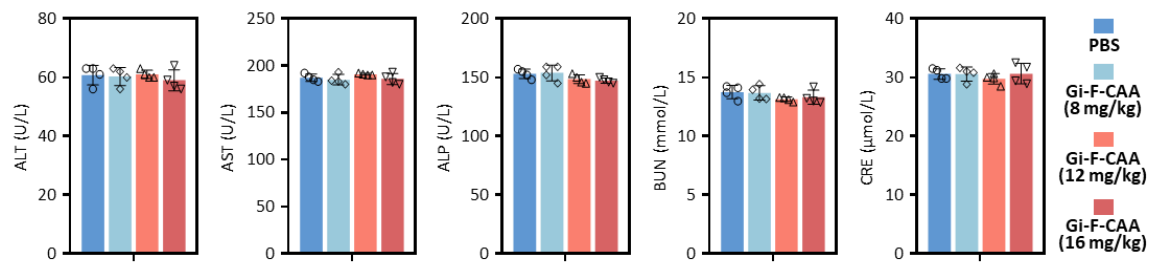

**Supplementary Fig. 37.** Blood biochemistry data of the mice including alanine aminotransferase (ALT), aspartate aminotransferase (AST), alkaline phosphatase (ALP), blood urea nitrogen (BUN) and creatinine (CRE) after treatment with PBS and **Gi-F-CAA** (8, 12 and 16 mg/kg in 100  $\mu$ L PBS) for 1 days (n=4 mice). Data were presented as mean  $\pm$  SD.

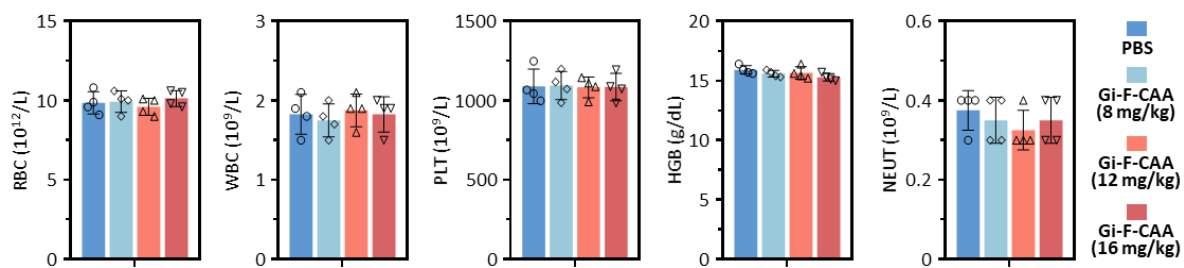

**Supplementary Fig. 38.** Blood routine examination of the mice including red blood cell (RBC), white blood cell (WBC), platelets (PLT), haemoglobin (HGB) and neutrophil (NEUT) after treatment with PBS and Gi-F-CAA (8, 12 and 16 mg/kg in 100  $\mu$ L PBS) for 1 days (n=4 mice). Data were presented as mean  $\pm$  SD.
